# Supplementary material for: ERAS in Tonsil Adenoid Surgery in Children
Source: Research Square preprint supplement (doi:10.21203/rs.3.rs-2625187/v1), 2023-03-06
Supplement: Supplementary file 1 [file cfcb42bc3a77451382a87784.docx]

|  | Control group (n=89) | ERAS group (n=190) | P-value |
| --- | --- | --- | --- |
| Gender (M/F) | 59/30 | 122/68 | 0.734 |
| Age (years) | 7.17±2.57 | 6.87±2.23 | 0.580 |
| Complications of anesthesia (cases) | 0 | 1 | 0.695 |
| Surgical complications (cases) | 2 | 3 | 0.443 |
| Infection in the operating area (cases) | 2 | 3 | 0.443 |
| Length of stay in hospital (days) | 6.37±1.08 | 5.05±1.20 | 0.000 |

**Supplementary Table 1:**

Comparison and analysis of two groups of data, surgical complications, anesthesia complications，hospitalization time.
